# Supplementary material for: One-pot synthesis of monodispersed porous CoFe2O4nanospheres on graphene as an efficient electrocatalyst for oxygen reduction and evolution reactions
Source: Royal Society of Chemistry journal article supplement (doi:10.1039/c5ra23306b), 2015-12-16
Supplement: c5ra23306b1.pdf [file c5ra23306b1.pdf]

Supplementary Information:

# One-pot synthesis of monodispersed porous CoFe<sub>2</sub>O<sub>4</sub> nanospheres on graphene as an efficient electrocatalyst for oxygen reduction and evolution reactions

Wenning Yan<sup>1</sup>, Xuecheng Cao<sup>1</sup>, Ke Ke<sup>2</sup>, Jinghua Tian<sup>1</sup>, Chao Jin<sup>1</sup> and Ruizhi Yang<sup>\*1</sup>

<sup>1</sup> College of Physics, Optoelectronics and Energy & Collaborative Innovation Center of Suzhou Nano Science and Technology, Soochow University, Suzhou, Jiangsu 215006, China.

<sup>2</sup> Chilwee group, Changxing, Zhejiang 313100, China.

---

\* Corresponding author: Tel.: +86 512 65221519.

E-mail: [yangrz@suda.edu.cn](mailto:yangrz@suda.edu.cn)

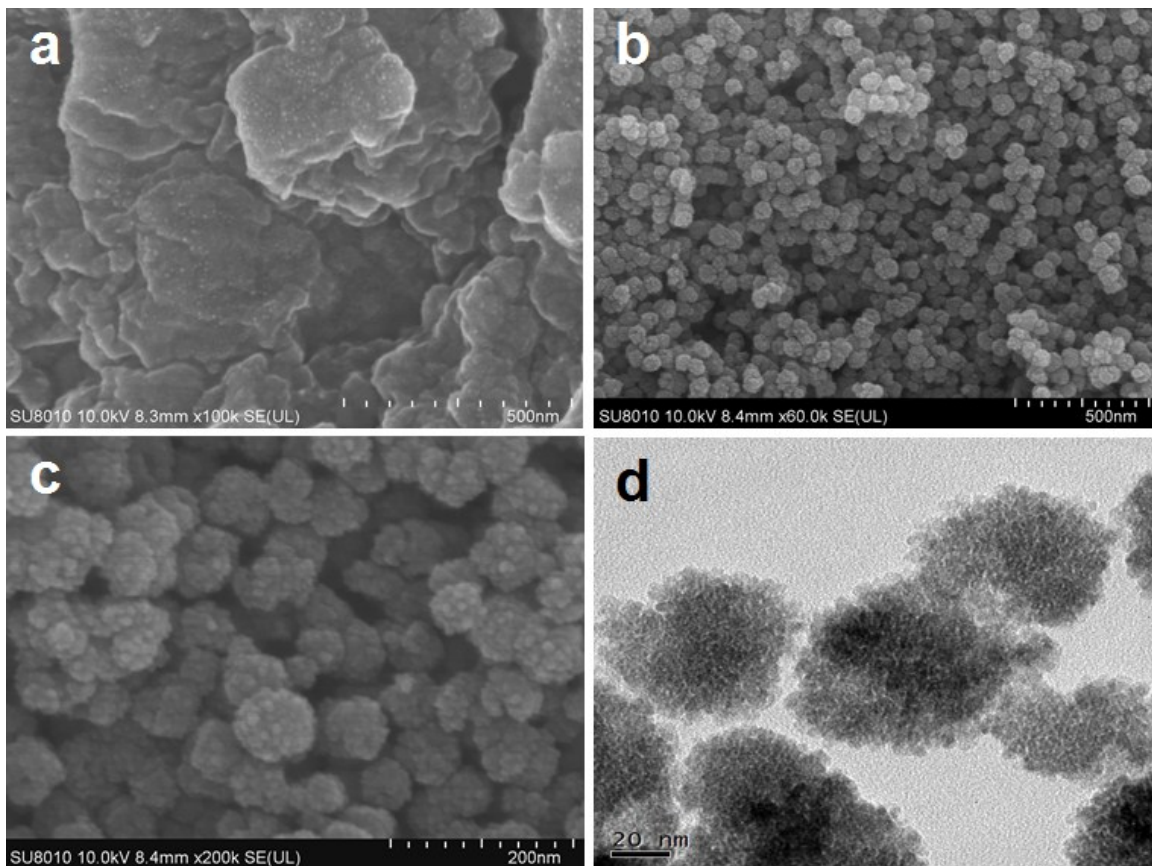

**Fig. S1**—(a) SEM image of CFO without the addition of PVP; (b) and (c) SEM images of the CFO-ns with different magnification; (d) TEM image of the CFO-ns.

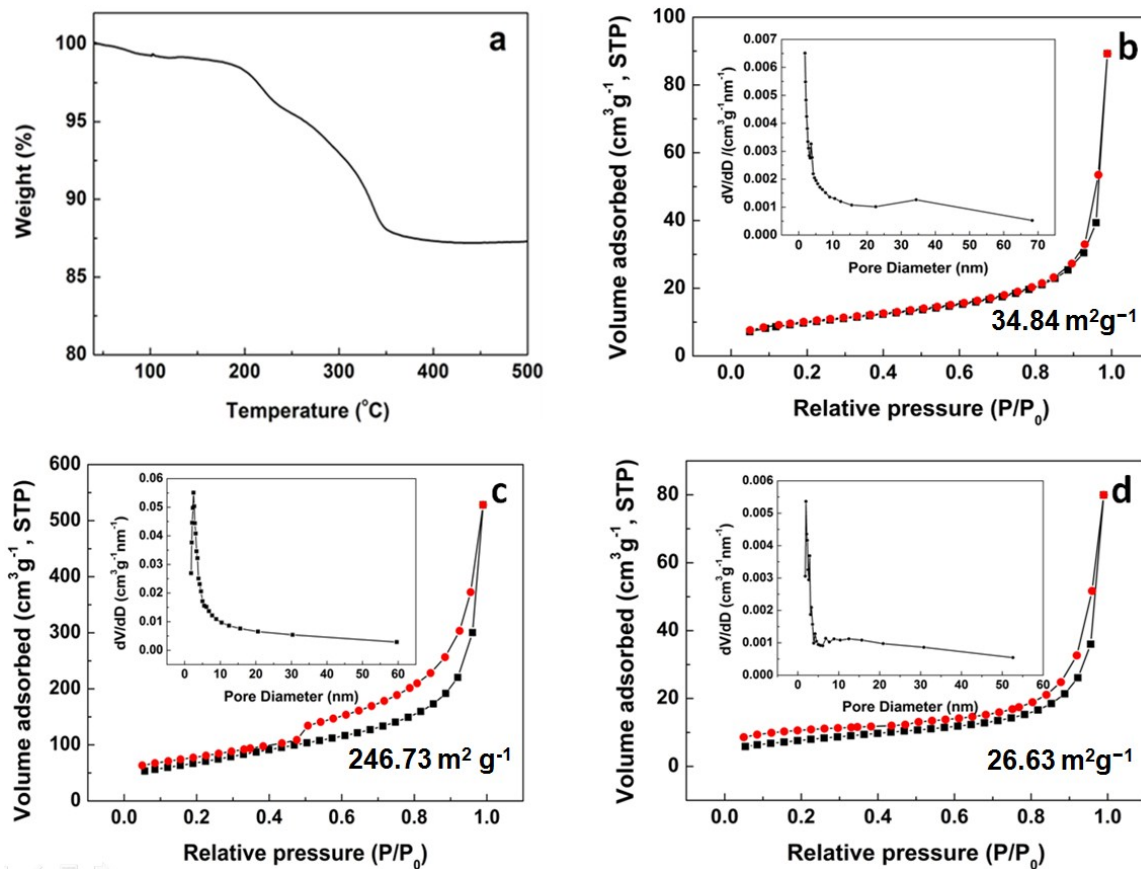

**Fig. S2**—(a) Thermogravimetric analysis (TGA) of the CFO-ns/N-rGO; (b-d) BET surface area and pore size distribution (inset) for CFO-ns/ rGO, rGO and CFO-ns.

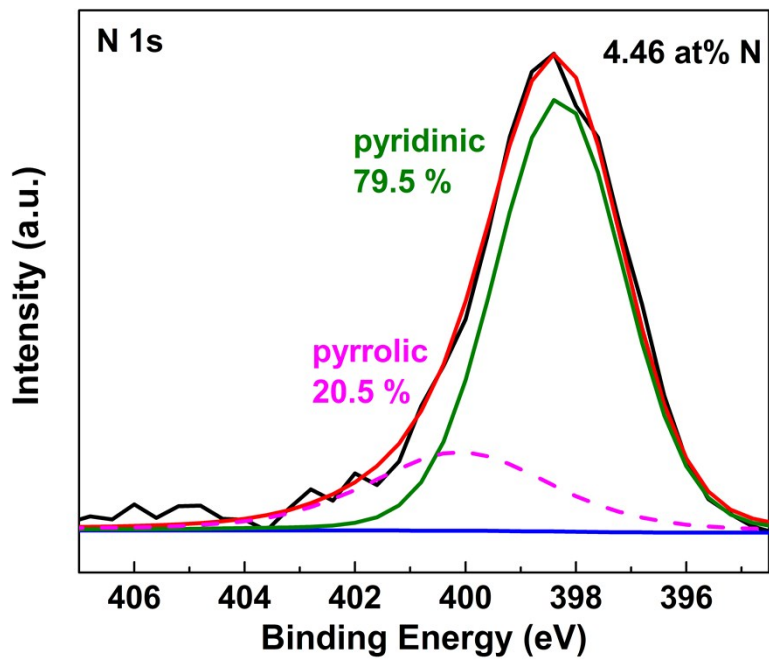

Fig. S3—Deconvoluted XPS spectra of N 1s in CFO-nS/N-rGO.

**Table S1**—The content of metallic ions in CFO-ns/rGO measured by ICP

| Element                | Wavelength (nm) | Concentrations of metal ions (mg/L ) |
|------------------------|-----------------|--------------------------------------|
| Co                     | 228.616         | 12.94                                |
| Fe                     | 238.204         | 26.21                                |
| momolar ratio of Fe/Co | —               | 2.03                                 |
